# Supplementary material for: Monkeypox 2022: A Primer and Identify-Isolate-Inform (3I) Tool for Emergency Medical Services Professionals
Source: PubMed Central journal article supplement (PMC9470524; doi:10.1017/s1049023x22001121), 2022-10
Supplement: S1049023X22001121sup001.pdf [file S1049023X22001121sup001.pdf]

# Identify – Isolate – Inform

## Monkeypox 2022

### A 3I Tool for EMS Professionals

Information Current as of July 17, 2022

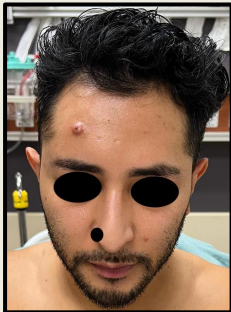

## IDENTIFY<sup>A</sup>

<sup>A</sup> Alerted by emergency medical dispatcher of exposed or confirmed monkeypox patient

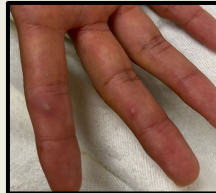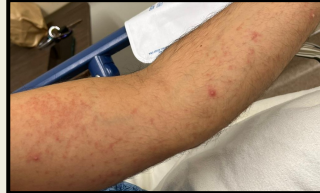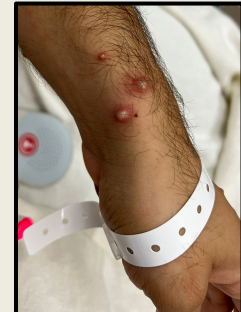

Photos Courtesy of Roneet Lev, MD

## EXPOSURE

1. Contact with person(s) with suspected or confirmed monkeypox  
**or**
2. Contact with person(s) with **rash** consistent with monkeypox  
**or**
3. Multiple or anonymous sexual partners<sup>B</sup>  
**or**
4. Attended a large party that included sex with multiple partners  
**or**
5. Contact with animals with suspected monkeypox<sup>C</sup>  
**or**
6. Travel within 21 days to a region with endemic monkeypox

<sup>B</sup> Within a social network with probable or known monkeypox

<sup>C</sup> Live or dead endemic African animals (e.g., rodents, such as Gambian pouched rats or prairie dogs, and some non-human primates) or their products (e.g., meats, creams, lotions, powders)

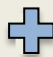

## SIGNS & SYMPTOMS

### Prodrome<sup>D</sup>

- Fever<sup>E</sup>, chills
- Lymphadenopathy (distinguishes from smallpox)
- Backache
- Myalgia
- Sore throat or cough
- Asthenia (profound weakness)
- Malaise
- Enanthem (e.g, rash in mouth or anus)
- Nausea, vomiting, diarrhea
- Tenesmus (painful urge to defecate when no stool present)

Exanthem (rash) may occur concurrent with prodrome or follow within 4 days

- Progression from:  
macular → papular → vesicular → pustular → crusts → scarring
- Often in same stage of development within a body region
- Typically manifests **initially in genital/anal region<sup>F</sup>** followed by face, palms, and soles
- Often becomes generalized
- Not attributable to other conditions<sup>G</sup>

<sup>D</sup> Begins after an incubation period of 5-21 days (usually 6-13 days)

- May be subclinical or manifest simultaneously with exanthem
- Patients in non-endemic countries are commonly afebrile with no lymphadenopathy and few skin lesions

<sup>E</sup> Subjective or confirmed ( $\geq 38$  °C/100.4 °F)

<sup>F</sup> May be so painful that the person seeks medical care or is unable to urinate

<sup>G</sup> Consider smallpox, chickenpox, measles, scabies, hand-foot-and-mouth disease, methicillin-resistant *Staphylococcus aureus* (MRSA), and sexually transmitted infections (e.g., syphilis, HIV, chancroid, herpes)

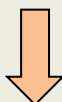

## ISOLATE

- Don PPE: N95 respirator/equivalent (or higher level), gloves, gown, eye protection, and shoe covers (if available)
- Place surgical mask on patient for source control
- Cover patient's lesions and rashes
- Avoid aerosol-generating procedures (AGPs), especially in confined spaces
- Disinfect contaminated surfaces (e.g., back of the ambulance, gurney)
- Carefully discard stretcher covers<sup>H</sup>

<sup>H</sup> Use caution as skin sheddings can be infectious and become aerosolized

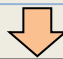

## INFORM<sup>I</sup>

- Agency's infection control officer [ Insert local phone number: ]
- Receiving facility's healthcare staff [ Insert phone numbers: ]
- Local health department (if patient not transported) [ Insert phone numbers: ]

<sup>I</sup> Notify receiving hospital as early as possible before arrival to facilitate safe transfer of care of these potentially infectious patients
